# Supplementary material for: Synthesis, characterization, and photophysical properties of a thiophene-functionalized bis(pyrazolyl) pyridine (BPP) tricarbonyl rhenium(i) complex
Source: Royal Society of Chemistry journal article supplement (doi:10.1039/c0dt00357c), 2010-01-01
Supplement: c0dt00357c.pdf [file c0dt00357c.pdf]

**Supporting Information Accompanying:**

**Synthesis, Characterization, and Photophysical Properties of a  
Thiophene-Functionalized Bis(pyrazolyl) Pyridine (BPP)  
Tricarbonyl Rhenium(I) Complex**

*Lauren A. Lytwak, Julie M. Stanley, Michelle L. Mejía, Bradley J. Holliday\**

Department of Chemistry and Biochemistry and Center for Electrochemistry, The University of Texas at  
Austin, 1 University Station, A5300, Austin, TX 78712-0615

[bholliday@cm.utexas.edu](mailto:bholliday@cm.utexas.edu)

|                                                                                         |    |
|-----------------------------------------------------------------------------------------|----|
| Figure S1. Variable temperature $^1\text{H}$ NMR of <b>1</b> : Full spectrum.....       | S2 |
| Figure S2. Variable temperature $^1\text{H}$ NMR of <b>1</b> : Aromatic expansions..... | S3 |
| Figure S3. Computed chemical shift versus torsion angle of <b>1</b> .....               | S4 |

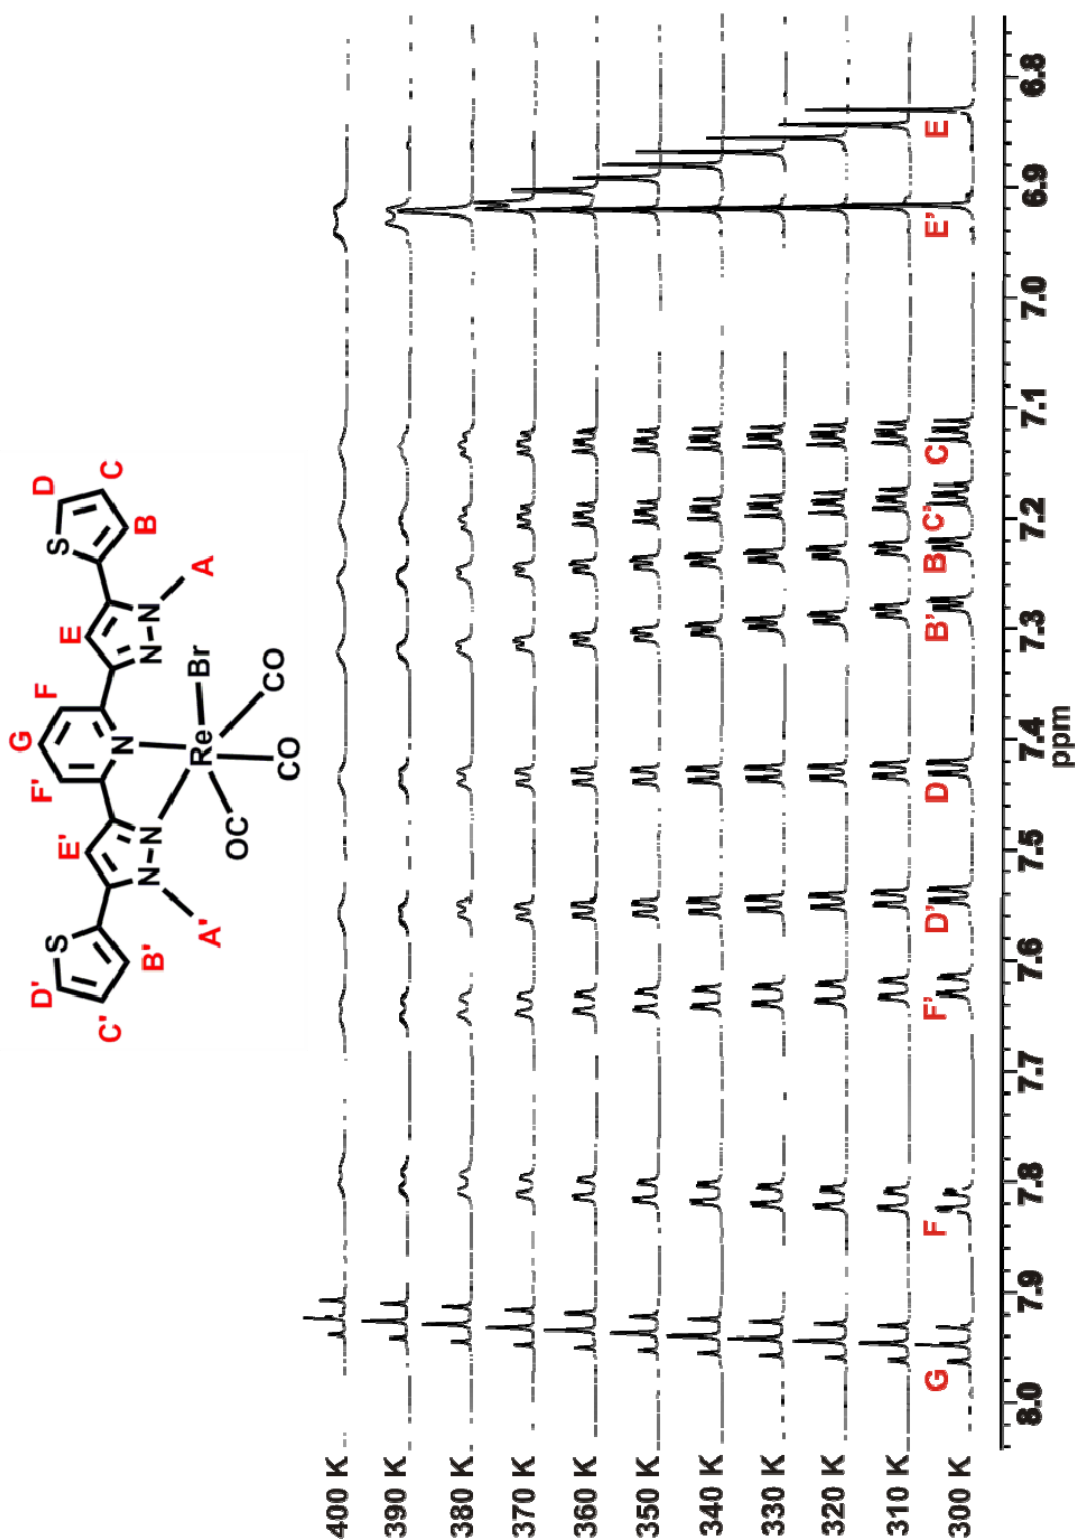

**Figure S1.** Full variable temperature  $^1\text{H}$  NMR spectra of **1** in  $(\text{CDCl}_3)_2$ .

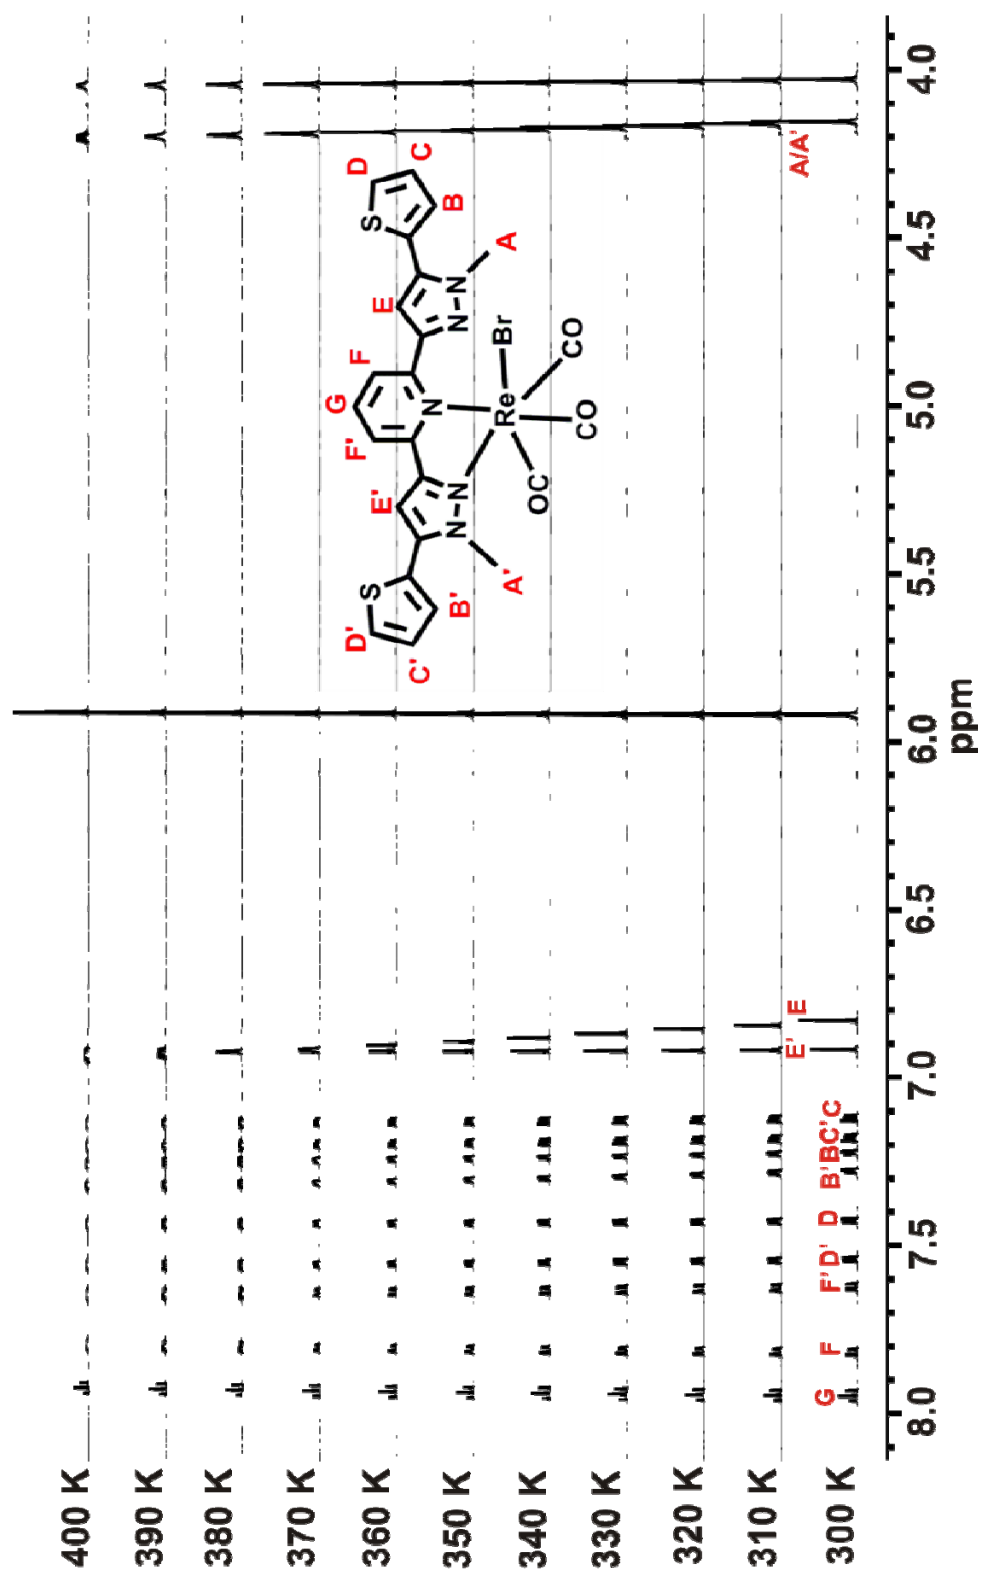

**Figure S2.** Aromatic expansions of the variable temperature  $^1\text{H}$  NMR spectra of **1** in  $(\text{CDCl}_2)_2$ .

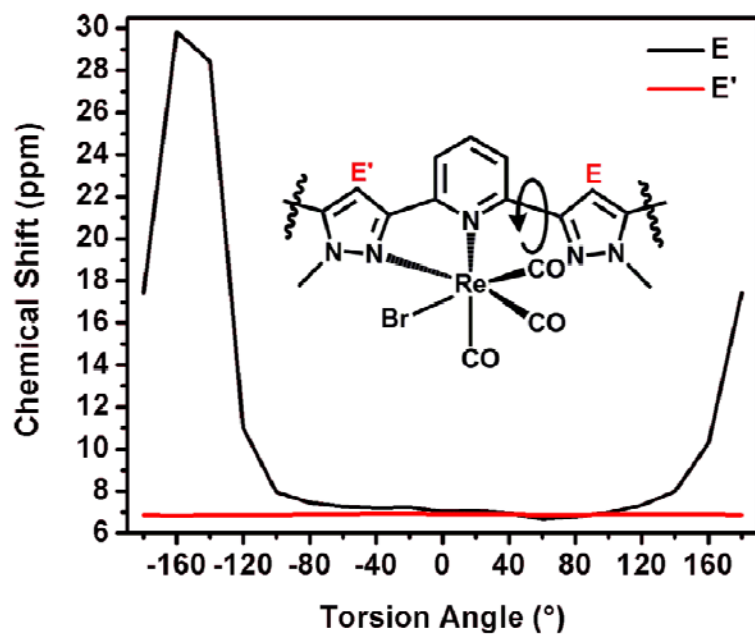

**Figure S3.** Computed chemical shift versus torsion angle of **1**.
